# Supplementary material for: A Deep Learning Approach to Increase the Value of Satellite Data for PM2.5 Monitoring in China
Source: MDPI journal article supplement (doi:10.3390/rs15153724), 2023-07-26
Supplement: s1 [file s1]

# A Deep Learning Approach to Increase the Value of Satellite Data for PM<sub>2.5</sub> Monitoring in China

Bo Li <sup>1</sup>, Cheng Liu <sup>2,3,4,5,\*</sup>, Qihou Hu <sup>3</sup>, Mingzhai Sun <sup>2</sup>, Chengxin Zhang <sup>2</sup>, Yizhi Zhu <sup>2</sup>, Ting Liu <sup>1</sup>, Yike Guo <sup>6</sup>, Gregory R. Carmichael <sup>7</sup> and Meng Gao <sup>8,9</sup>

**Table S1.** Number of CNEMC stations at different population densities (people/km<sup>2</sup>) and the area percentage of different population densities (within parentheses).

|                  | <1    | 1~25  | 25~100 | 100~500 | 500~1000 | >1000  |
|------------------|-------|-------|--------|---------|----------|--------|
| North China      | 0(7)  | 2(18) | 0(25)  | 12(30)  | 37(16)   | 125(4) |
| East China       | 0(3)  | 0(0)  | 1(6)   | 39(59)  | 56(25)   | 247(7) |
| South China      | 0(13) | 0(0)  | 5(7)   | 37(69)  | 45(7)    | 150(4) |
| Sichuan Basin    | 0(0)  | 0(25) | 7(17)  | 33(48)  | 54(8)    | 51(2)  |
| Shaanxi Province | 0(0)  | 0(7)  | 0(30)  | 41(52)  | 35(9)    | 101(2) |

**Table S2.** The occurrences of marked cloudy conditions.

|       | 2017             | Spring | Summer | Autumn | Winter | Year |
|-------|------------------|--------|--------|--------|--------|------|
| MODIS | North China      | 0.62   | 0.66   | 0.60   | 0.83   | 0.67 |
|       | Eastern China    | 0.66   | 0.76   | 0.71   | 0.69   | 0.71 |
|       | South China      | 0.86   | 0.88   | 0.79   | 0.77   | 0.83 |
|       | Sichuan Basin    | 0.81   | 0.80   | 0.84   | 0.83   | 0.82 |
|       | Shaanxi Province | 0.66   | 0.66   | 0.68   | 0.74   | 0.68 |

**Table S3** The input data shape

| Category    | Name                 | shape type             | shape     |
|-------------|----------------------|------------------------|-----------|
| AOD data    | Himawari-8 Current   | width,length,time      | 32,32,4   |
|             | Himawari-8 Closeness | width,length,time      | 32,32,10  |
|             | Himawari-8 Period    | width,length,time      | 32,32,7   |
|             | MODIS                | width,length,band×time | 32,32,3×7 |
| Meteorology | rh                   | width,length,time      | 32,32,9   |
|             | temperature          | width,length,time      | 32,32,9   |
|             | pressure             | width,length,time      | 32,32,9   |
|             | hpbl                 | width,length,time      | 32,32,9   |
|             | u                    | width,length,time      | 32,32,9   |

|                                |                 |                     |          |
|--------------------------------|-----------------|---------------------|----------|
|                                | v               | width,length,time   | 32,32,9  |
|                                | rh              | width,length,height | 32,32,12 |
|                                | temperature     | width,length,height | 32,32,12 |
|                                | pressure        | width,length,height | 32,32,12 |
|                                | hpbl            | width,length,height | 32,32,1  |
|                                | u               | width,length,height | 32,32,12 |
|                                | v               | width,length,height | 32,32,12 |
| Geographic<br>information data | POI             | width,length,type   | 64,64,7  |
|                                | Traffic Network | width,length,type   | 64,64,9  |
|                                | DEM             | width,length,type   | 64,64,1  |
|                                | GDP             | width,length,type   | 64,64,1  |
|                                | Tpop            | width,length,type   | 64,64,1  |
|                                | Land Cover Type | width,length,type   | 32,32,17 |
|                                | EVI             | width,length,type   | 32,32,1  |
|                                | NDVI            | width,length,type   | 32,32,1  |

**Table S4. MODIS MCD12C1 Land Cover Type**

| Class | Description                 | Class | Description                        |
|-------|-----------------------------|-------|------------------------------------|
| 0     | water                       | 9     | savannas                           |
| 1     | evergreen needleleaf forest | 10    | grasslands                         |
| 2     | evergreen broadleaf forest  | 11    | permanent wetlands                 |
| 3     | deciduous needleleaf forest | 12    | croplands                          |
| 4     | deciduous broadleaf forest  | 13    | urban and built-up                 |
| 5     | mixed forests               | 14    | cropland/natural vegetation mosaic |
| 6     | closed shrubland            | 15    | snow and ice                       |
| 7     | open shrublands             | 16    | barren or sparsely vegetated       |
| 8     | woody savannas              |       |                                    |

**Table S5. Traffic Network classification.**

| Class | Description    | Class | Description  |
|-------|----------------|-------|--------------|
| 0     | primary        | 5     | track        |
| 0     | primary_link   | 5     | track_grade  |
| 1     | secondary      | 6     | trunk        |
| 1     | secondary_link | 6     | trunk_link   |
| 2     | tertiary       | 6     | bridleway    |
| 2     | tertiary_link  | 7     | unknown      |
| 3     | motorway       | 7     | unclassified |
| 3     | motorway_link  | 8     | footway      |
| 4     | living_street  | 8     | path         |
| 4     | residential    | 8     | pedestrian   |
| 4     | steps          |       |              |
| 4     | service        |       |              |
| 4     | cycleway       |       |              |

**Table S6.** Point of Interest classification.

| Class | Description                       | Class | Description                     |
|-------|-----------------------------------|-------|---------------------------------|
| 01    | automobile service                | 03    | health care service             |
| 01    | car sale                          | 03    | accommodation service           |
| 01    | vehicle maintenance and repair    | 03    | serviced apartment              |
| 01    | Motorcycle service                | 04    | tourist attraction              |
| 01    | transportation facilities service | 05    | education and culture service   |
| 02    | catering service                  | 06    | government organization         |
| 02    | shopping service                  | 06    | financial and insurance service |
| 03    | life services                     | 06    | incorporated business           |
| 03    | sport and leisure services        | 07    | factory                         |

**Table S7.**

The  $\alpha$  of bivariate test between each parameter and PM<sub>2.5</sub>.(pearsonr p-value)

| $\alpha$ | Himawari-8 | MOD | MYD | Tempc | Pressure | RH | HPBL | U | V | DEM | GDP   | TPOP |
|----------|------------|-----|-----|-------|----------|----|------|---|---|-----|-------|------|
| PM2.5    | 0          | 0   | 0   | 0     | 0        | 0  | 0    | 0 | 0 | 0   | 0.036 | 0.01 |

The  $\alpha$  of bivariate test between each parameter and PM<sub>2.5</sub>.(Chi-square p-value)

| $\alpha$ | Road | POI  | Land Cover Type |
|----------|------|------|-----------------|
| PM2.5    | 0.04 | 0.04 | 0               |

The Maximum Information Coefficient between continuous parameters and PM<sub>2.5</sub>

| CIM   | Himawari-8 | MOD  | MYD  | Tempc | Pressure | Rh   | Hpbl | U    | V    | DEM  | GDP  | Tpop | NDVI | EVI  |
|-------|------------|------|------|-------|----------|------|------|------|------|------|------|------|------|------|
| PM2.5 | 0.27       | 0.51 | 0.49 | 0.31  | 0.34     | 0.34 | 0.30 | 0.24 | 0.23 | 0.74 | 0.51 | 0.59 | 0.27 | 0.29 |

**Table S8.** The spatial ranges of study regions.

|                  | top_latitude | bottom_latitude | left_longitude | right_longitude |
|------------------|--------------|-----------------|----------------|-----------------|
| North China      | 45°N         | 35°N            | 110°E          | 120°E           |
| East China       | 36°N         | 26°N            | 112°E          | 122°E           |
| South China      | 30°N         | 20°N            | 108°E          | 118°E           |
| Sichuan Basin    | 36°N         | 26°N            | 100°E          | 110°E           |
| Shaanxi Province | 40°N         | 30°N            | 105°E          | 115°E           |

**Table S9.** Major features of previous related studies.

| Study      | Model     | Resolution | Study Area        | Sample Validation |       |      | Space Validation |     |     | Time Validation |     |     |
|------------|-----------|------------|-------------------|-------------------|-------|------|------------------|-----|-----|-----------------|-----|-----|
|            |           |            |                   | R <sup>2</sup>    | RMS   | Slo  | R <sup>2</sup>   | RMS | Slo | R <sup>2</sup>  | RMS | Slo |
|            |           |            |                   |                   | E     | p    |                  | E   | p   |                 | E   | p   |
| (Ma et al. | Two-Stage | 0.1° daily | China (2004~2013) | 0.7               | 27.42 | 0.79 | -                | -   | -   | -               | -   | -   |

|                      |                     |                                       |                                    |          |       |      |          |       |      |          |       |      |
|----------------------|---------------------|---------------------------------------|------------------------------------|----------|-------|------|----------|-------|------|----------|-------|------|
| 2016)                |                     |                                       |                                    | 9        |       |      |          |       |      |          |       |      |
| (Fang et al. 2016)   | TSAM                | 10km daily                            | China (2013.6~2014.5)              | 0.8<br>0 | 22.75 | 0.79 | -        | -     | -    | -        | -     | -    |
| (Wang et al. 2016)   | Linear Regression   | 0.03° night                           | Atlanta city (2012.8~2012.10)      | -        | -     | -    | 0.4<br>5 | 4.11  | 1.00 | -        | -     | -    |
| (Wei et al. 2016)    | GWR                 | 3km daily                             | China(2014)                        | 0.7<br>9 | 18.60 | 0.83 | -        | -     | -    | -        | -     | -    |
| (Li et al. 2017)     | Geoi-DBN            | 10km daily                            | China (2015)                       | 0.8<br>8 | 13.03 | 0.88 | 0.8<br>2 | 16.42 | 0.86 | -        | -     | -    |
| (Yu et al. 2017)     | Gauss               | 10km daily                            | China (2013)                       | 0.8<br>1 | 21.87 | 0.73 | -        | -     | -    | -        | -     | -    |
| (Xiao et al. 2017)   | Multiple Imputation | 1km daily (full coverage)             | Yangtze River Delta (2013~2014)    | 0.8<br>1 | 25.00 | 0.99 | -        | -     | -    | -        | -     | -    |
| (He and Huang 2018)  | GTWR                | 3km daily                             | China (2015)                       | 0.8<br>0 | 18.00 | 0.81 | 0.7<br>5 | 20.73 | 0.79 | 0.5<br>8 | 28.24 | 0.61 |
| (Fu et al. 2018)     | Mixed-Effect        | 0.01° night                           | Beijing (2013.12~2014.11)          | -        | -     | -    | 0.8<br>6 | 32.4  | -    | -        | -     | -    |
| (Shtein et al. 2019) | GAM                 | 1km daily                             | Italy (2013~2015)                  | -        | -     | -    | 0.8<br>0 | 6.06  | 0.99 | -        | -     | -    |
| (Chen et al. 2019)   | SMLM                | 0.05° hourly (daytime)                | covers most of China (2016)        | 0.8<br>5 | 17.30 | 0.86 | -        | -     | -    | -        | -     | -    |
| (Zhang et al. 2019)  | ST-LME              | 5km hourly (daytime)                  | east-central China(2015.7~2017.7 ) | 0.8<br>0 | -     | -    | -        | -     | -    | -        | -     | -    |
| (Wei et al. 2019)    | ST-RF               | 1km daily                             | China (2015)                       | 0.8<br>5 | 15.57 | 0.82 | 0.8<br>3 | 16.63 | 0.81 | 0.6<br>3 | 24.83 | 0.62 |
| (Bi et al. 2019)     | RF                  | 1km daily (full coverage)             | New York State (2015)              | 0.8<br>2 | 2.16  | 1.05 | -        | -     | -    | -        | -     | -    |
| (Zhang et al. 2019)  | XGBoost             | 3km daily (nearly full coverage)      | China (2014~2015)                  | 0.8<br>7 | 16.33 | -    | 0.8<br>6 | 17.89 | -    | 0.6<br>7 | 25.87 | -    |
| (Tang et al. 2019)   | Two-Stage RF        | 1km hourly (full day) (full coverage) | Yangtze River Delta (2017)         | -        | -     | -    | 0.8<br>6 | 12.4  | 0.81 | -        | -     | -    |
| (Liu et al. 2019)    | RF                  | 5km hourly(daytime )                  | China(2016)                        | 0.8<br>6 | 17.20 | 0.81 | -        | -     | -    | -        | -     | -    |
| (Jiang et al. 2020)  | Two-Stage RF        | 1km hourly(full day) (full coverage)  | China(2018)                        | 0.8<br>5 | 11.02 | -    | 0.7<br>4 | 14.65 | -    | -        | -     | -    |
| (Wei et al. 2020)    | Enhanced ST-ET      | 1km daily                             | China (2017~2018)                  | 0.8<br>9 | 10.33 | 0.86 | 0.8<br>8 | 10.93 | 0.85 | -        | -     | -    |
| (Park et al. 2020)   | CNN-RF              | 12km daily                            | America (2011)                     | 0.8      | 2.55  | 1.04 | 0.6      | 3.55  | 1.00 | 0.8      | 2.55  | 1.05 |



|                                |         |                                              |                                     |          |       |      |          |       |      |          |       |      |
|--------------------------------|---------|----------------------------------------------|-------------------------------------|----------|-------|------|----------|-------|------|----------|-------|------|
| al. 2020)                      |         |                                              |                                     | 4        |       |      | 9        |       |      | 4        |       |      |
| Xiao et.al<br>(2018)           | Model   | 0.1°daily                                    | China (2013~2017)                   | 0.7<br>9 | 21    | 1    | 0.7<br>6 | 22    | 1    | 0.7<br>3 | 24    | 1    |
| Liu et. al<br>(2019)           | RF      | 5km hourly<br>(daytime)                      | China (2016)                        | 0.8<br>6 | 17.3  | 0.82 | -        | -     | -    | -        | -     | -    |
| Mhawish<br>et. al<br>(2020)    | LME+RF  | 1km daily                                    | IGP (2018.7~2019.6)                 | 0.8<br>7 | 28    | 0.84 | 0.8<br>7 | 28.1  | 0.84 |          |       |      |
| Guo et.<br>Al<br>(2021)        | RF      | 1km daily                                    | China (2017)                        | 0.7<br>4 | 16.29 | 0.61 | 0.7<br>2 | 16.73 | 0.6  | 0.3<br>6 | 20.41 | 0.34 |
| Schneide<br>r et. al<br>(2020) | RF      | 1km daily                                    | Great Britain<br>(2008~2018)        | 0.7<br>7 | 4.042 | 1.05 | 0.6<br>6 | 2.24  | 0.99 | 0.8      | 3.38  | 1.06 |
| Dong et.<br>al<br>(2020)       | RF-BPNN | 0.05°hourly<br>(daytime)                     | China (2017)                        | 0.8      | 18.54 |      | 0.7<br>6 | 20.27 |      |          |       |      |
| This<br>study                  | ST-NN   | 0.01° hourly<br>(full day)(full<br>coverage) | covers most of China<br>(2017~2020) | 0.8<br>8 | 12.98 | 0.99 | 0.8<br>5 | 14.33 | 1.02 | 0.8<br>6 | 14.69 | 1.02 |

## References:

- Ma, Z.; Hu, X.; Sayer, A. M.; Levy, R.; Zhang, Q.; Xue, Y.; Tong, S.; Bi, J.; Huang, L.; Liu, Y., Satellite-based spatiotemporal trends in PM<sub>2.5</sub> concentrations: China, 2004–2013. *Environmental health perspectives* 2016, 124, (2), 184-192.
- Fang, X.; Zou, B.; Liu, X.; Sternberg, T.; Zhai, L., Satellite-based ground PM<sub>2.5</sub> estimation using timely structure adaptive modeling. *Remote Sensing of Environment* 2016, 186, 152-163.
- Wang, J.; Aegerter, C.; Xu, X.; Szykman, J. J., Potential application of VIIRS Day/Night Band for monitoring nighttime surface PM<sub>2.5</sub> air quality from space. *Atmospheric environment* 2016, 124, 55-63.
- You, W.; Zang, Z.; Zhang, L.; Li, Y.; Pan, X.; Wang, W., National-scale estimates of ground-level PM<sub>2.5</sub> concentration in China using geographically weighted regression based on 3 km resolution MODIS AOD. *Remote Sensing* 2016, 8, (3), 184.
- Li, T.; Shen, H.; Yuan, Q.; Zhang, X.; Zhang, L., Estimating ground-level PM<sub>2.5</sub> by fusing satellite and station observations: a geo-intelligent deep learning approach. *Geophysical Research Letters* 2017, 44, (23), 11,985-11,993.
- Yu, W.; Liu, Y.; Ma, Z.; Bi, J., Improving satellite-based PM<sub>2.5</sub> estimates in China using Gaussian processes modeling in a Bayesian hierarchical setting. *Scientific reports* 2017, 7, (1), 1-9.
- Xiao, Q.; Wang, Y.; Chang, H. H.; Meng, X.; Geng, G.; Lyapustin, A.; Liu, Y., Full-coverage high-resolution daily PM<sub>2.5</sub> estimation using MAIAC AOD in the Yangtze River Delta of China. *Remote Sensing of Environment* 2017, 199, 437-446.
- He, Q.; Huang, B., Satellite-based mapping of daily high-resolution ground PM<sub>2.5</sub> in China via space-time regression modeling. *Remote Sensing of Environment* 2018, 206, 72-83.
- Fu, D.; Xia, X.; Duan, M.; Zhang, X.; Li, X.; Wang, J.; Liu, J., Mapping nighttime PM<sub>2.5</sub> from VIIRS DNB

using a linear mixed-effect model. *Atmospheric Environment* 2018, 178, 214-222.

Shtein, A.; Kloog, I.; Schwartz, J.; Silibello, C.; Michelozzi, P.; Gariazzo, C.; Viegi, G.; Forastiere, F.; Karnieli, A.; Just, A. C., Estimating daily PM<sub>2.5</sub> and PM<sub>10</sub> over Italy using an ensemble model. *Environmental science & technology* 2019, 54, (1), 120-128.

Chen, J.; Yin, J.; Zang, L.; Zhang, T.; Zhao, M., Stacking machine learning model for estimating hourly PM<sub>2.5</sub> in China based on Himawari 8 aerosol optical depth data. *Science of The Total Environment* 2019, 697, 134021.

Zhang, T.; Zang, L.; Wan, Y.; Wang, W.; Zhang, Y., Ground-level PM<sub>2.5</sub> estimation over urban agglomerations in China with high spatiotemporal resolution based on Himawari-8. *Science of the total environment* 2019, 676, 535-544.

Wei, J.; Huang, W.; Li, Z.; Xue, W.; Peng, Y.; Sun, L.; Cribb, M., Estimating 1-km-resolution PM<sub>2.5</sub> concentrations across China using the space-time random forest approach. *Remote Sensing of Environment* 2019, 231, 111221.

Bi, J.; Belle, J. H.; Wang, Y.; Lyapustin, A. I.; Wildani, A.; Liu, Y., Impacts of snow and cloud covers on satellite-derived PM<sub>2.5</sub> levels. *Remote sensing of environment* 2019, 221, 665-674.

Chen, Z.-Y.; Zhang, T.-H.; Zhang, R.; Zhu, Z.-M.; Yang, J.; Chen, P.-Y.; Ou, C.-Q.; Guo, Y., Extreme gradient boosting model to estimate PM<sub>2.5</sub> concentrations with missing-filled satellite data in China. *Atmospheric Environment* 2019, 202, 180-189.

Tang, D.; Liu, D.; Tang, Y.; Seyler, B. C.; Deng, X.; Zhan, Y., Comparison of GOCI and Himawari-8 aerosol optical depth for deriving full-coverage hourly PM<sub>2.5</sub> across the Yangtze River Delta. *Atmospheric Environment* 2019, 217, 116973.

Liu, J.; Weng, F.; Li, Z., Satellite-based PM<sub>2.5</sub> estimation directly from reflectance at the top of the atmosphere using a machine learning algorithm. *Atmospheric Environment* 2019, 208, 113-122.

Jiang, T.; Chen, B.; Nie, Z.; Ren, Z.; Xu, B.; Tang, S., Estimation of hourly full-coverage PM<sub>2.5</sub> concentrations at 1-km resolution in China using a two-stage random forest model. *Atmospheric Research* 2021, 248, 105146.

Wei, J.; Li, Z.; Cribb, M.; Huang, W.; Xue, W.; Sun, L.; Guo, J.; Peng, Y.; Li, J.; Lyapustin, A., Improved 1 km resolution PM<sub>2.5</sub> estimates across China using enhanced space-time extremely randomized trees. *Atmospheric Chemistry and Physics* 2020, 20, (6), 3273-3289.

Park, Y.; Kwon, B.; Heo, J.; Hu, X.; Liu, Y.; Moon, T., Estimating PM<sub>2.5</sub> concentration of the conterminous United States via interpretable convolutional neural networks. *Environmental Pollution* 2020, 256, 113395.

Xiao, Q., Chang, H. H., Geng, G., and Liu, Y.: An Ensemble Machine-Learning Model To Predict Historical PM<sub>2.5</sub> Concentrations in China from Satellite Data, *Environmental Science & Technology*, 52, 13260-13269, 10.1021/acs.est.8b02917, 2018.

Liu, J.; Weng, F.; Li, Z., Satellite-based PM<sub>2.5</sub> estimation directly from reflectance at the top of the atmosphere using a machine learning algorithm. *Atmospheric Environment* 2019, 208, 113-122, doi:<https://doi.org/10.1016/j.atmosenv.2019.04.002>.

Mhawish, A., Banerjee, T., Sorek-Hamer, M., Bilal, M., Lyapustin, A. I., Chatfield, R., and Broday, D. M.: Estimation of High-Resolution PM<sub>2.5</sub> over the Indo-Gangetic Plain by Fusion of Satellite Data, Meteorology, and Land Use Variables, *Environmental Science & Technology*, 54, 7891-7900, 10.1021/acs.est.0c01769, 2020.

Guo, B., Zhang, D., Pei, L., Su, Y., Wang, X., Bian, Y., Zhang, D., Yao, W., Zhou, Z., and Guo, L.: Estimating PM<sub>2.5</sub> concentrations via random forest method using satellite, auxiliary, and ground-level station dataset at multiple temporal scales across China in 2017, *Science of The Total Environment*, 778, 146288, <https://doi.org/10.1016/j.scitotenv.2021.146288>, 2021.

Schneider, R., Vicedo-Cabrera, A. M., Sera, F., Masselot, P., Stafoggia, M., de Hoogh, K., Kloog, I., Reis, S., Vieno, M., and Gasparrini, A.: A Satellite-Based Spatio-Temporal Machine Learning Model to Reconstruct Daily PM<sub>2.5</sub> Concentrations across Great Britain, *Remote Sensing*, 12, 3803, 2020.

Dong, L., Li, S., Yang, J., Shi, W., and Zhang, L.: Investigating the performance of satellite-based models in estimating the surface PM2.5 over China, Chemosphere, 256, 127051, <https://doi.org/10.1016/j.chemosphere.2020.127051>, 2020.

**Table S10.** The influences of different data quality treatments on the performance of the model.

| train                | test                 | RMSE  | MAE   | Slope | R-square |
|----------------------|----------------------|-------|-------|-------|----------|
| without empty data   | without empty data   | 16.53 | 10.10 | 0.98  | 0.87     |
|                      | without outlier data | 14.62 | 9.55  | 0.96  | 0.87     |
| without outlier data | without empty data   | 18.24 | 10.46 | 1.06  | 0.84     |
|                      | without outlier data | 14.30 | 9.46  | 1.00  | 0.87     |

**Table S11.** Data quality control status.

|                  | 2017(N) |          | 2018(N) |          | 2019(N) |          | 2020(N) |          | Rate |
|------------------|---------|----------|---------|----------|---------|----------|---------|----------|------|
|                  | outlier | not null |      |
| North China      | 188547  | 1340252  | 186265  | 1241169  | 180120  | 1257882  | 175359  | 1228487  | 0.14 |
| East China       | 420792  | 2663647  | 364102  | 2525520  | 395344  | 2478030  | 381681  | 2503516  | 0.15 |
| South China      | 325190  | 1957469  | 280304  | 1875939  | 298656  | 1865894  | 342722  | 1908516  | 0.16 |
| Sichuan Basin    | 170788  | 1132051  | 168210  | 1043238  | 167905  | 1044349  | 170819  | 1062847  | 0.16 |
| Shaanxi Province | 189610  | 1369405  | 184997  | 1280065  | 184698  | 1277902  | 199430  | 1301866  | 0.15 |

**Table S12.** Statistics of number of stations used for training and testing

|                  | All       | Training  | Testing   | All Sample Number(N) |         |         |         |
|------------------|-----------|-----------|-----------|----------------------|---------|---------|---------|
|                  | Number(N) | Number(N) | Number(N) | 2017                 | 2018    | 2019    | 2020    |
| North China      | 176       | 150       | 26        | 1340252              | 1241169 | 1257882 | 1228487 |
| East China       | 343       | 308       | 35        | 2663647              | 2525520 | 2478030 | 2503516 |
| South China      | 237       | 213       | 24        | 1957469              | 1875939 | 1865894 | 1908516 |
| Sichuan Basin    | 145       | 130       | 15        | 1132051              | 1043238 | 1044349 | 1062847 |
| Shaanxi Province | 177       | 159       | 18        | 1369405              | 1280065 | 1277902 | 1301866 |

**Table S13.** Validation results for different scales of spatial region mask.

|       |                |      |            |      |            |      |            |      |            |      |
|-------|----------------|------|------------|------|------------|------|------------|------|------------|------|
| Train | 36°~44°N       |      | 27°~35°N   |      |            |      |            |      |            |      |
| Area  | 111°~119°E     |      | 123°~121°E |      |            |      |            |      |            |      |
| Mask  | 38.2°~40.2°N   |      | 29°~33°N   |      | 30°~33°N   |      | 31°~33°N   |      | 32°~33°N   |      |
| Area  | 114.1°~116.1°E |      | 116°~120°E |      | 117°~120°E |      | 118°~120°E |      | 118°~119°E |      |
| R-squ | Num            | Rate | Nu         | Rate | Num        | Rate | Num        | Rate | Num        | Rate |
|       |                |      |            |      |            |      |            |      |            |      |

| are      | ber (%) | mbe (%) | ber (%) |
|----------|---------|---------|---------|---------|---------|---------|---------|---------|---------|
|          |         | r       |         |         |         |         |         |         |         |
| <0.5     | / /     | 5 0.05  | 1 0.01  | / /     | / /     | / /     | / /     | / /     | / /     |
| 0.5~0.6  | / /     | 9 0.09  | 4 0.05  | / /     | / /     | / /     | / /     | / /     | / /     |
| 0.6~0.65 | / /     | 14 0.14 | 6 0.08  | / /     | / /     | / /     | / /     | / /     | / /     |
| 0.65~0.7 | / /     | 34 0.35 | 21 0.28 | 2 0.05  | / /     | / /     | / /     | / /     | / /     |
| 0.7~0.75 | 1 0.17  | 24 0.24 | 24 0.32 | 9 0.22  | / /     | 1 0.12  | / /     | 2 0.18  |         |
| 0.75~0.8 | 5 0.83  | 6 0.06  | 10 0.13 | 19 0.48 | 3 0.25  | 6 0.76  | / /     | 5 0.45  |         |
| >0.8     | / /     | 6 0.06  | 10 0.13 | 10 0.25 | 9 0.75  | 1 0.12  | 9 1     | 4 0.37  |         |

Table S14. Hourly validation of Near Real Time model (trained with data from 2017 to 2020 and test with 2020).

| R-square | Number | CNEMC mean | ST-NN mean |
|----------|--------|------------|------------|
| <0.4     | 10     | 16.26      | 19.81      |
| 0.4~0.45 | 8      | 35.28      | 30.51      |
| 0.45~0.5 | 21     | 35.73      | 35.44      |
| 0.5~0.55 | 26     | 41.17      | 43.72      |
| 0.55~0.6 | 30     | 40.70      | 43.96      |
| 0.6~0.65 | 20     | 39.47      | 41.74      |
| 0.65~0.7 | 26     | 41.26      | 45.04      |
| >0.7     | 9      | 42.30      | 47.40      |

Table S15. Assess the ability of the model to capture different levels of contamination through accuracy and precision.

|         | North China NRT model (>75µg/m³) |           | 29°~33°N,116°~120°E mask (>75µg/m³) |           | 30°~33°N,117°~120°E mask (>75µg/m³) |           | 31°~33°N,118°~120°E mask (>75µg/m³) |           |
|---------|----------------------------------|-----------|-------------------------------------|-----------|-------------------------------------|-----------|-------------------------------------|-----------|
| value   | Number                           |           | Number                              |           | Number                              |           | Number                              |           |
|         | accuracy                         | precision | accuracy                            | precision | accuracy                            | precision | accuracy                            | precision |
| <0.4    | /                                | 14        | /                                   | 9         | /                                   | 0         | /                                   | 1         |
| 0.4~0.5 | /                                | 6         | /                                   | 16        | /                                   | 1         | /                                   | 0         |
| 0.5~0.6 | /                                | 15        | /                                   | 21        | /                                   | 6         | /                                   | 4         |
| 0.6~0.7 | /                                | 28        | /                                   | 28        | /                                   | 13        | /                                   | 13        |
| 0.7~0.8 | /                                | 28        | /                                   | 14        | /                                   | 24        | /                                   | 11        |
| 0.8~0.9 | 31                               | 22        | 3                                   | 7         | /                                   | 20        | /                                   | 8         |
| >0.9    | 100                              | 18        | 95                                  | 3         | 82                                  | 18        | 45                                  | 8         |

Table S16. Validation results under different training and test proportions

| test:train                       | 1:9   | 2:8  | 3:7   | 4:6   | 5:5   | 6:4   | 7:3   |
|----------------------------------|-------|------|-------|-------|-------|-------|-------|
| R-squre                          | 0.81  | 0.81 | 0.78  | 0.77  | 0.76  | 0.76  | 0.74  |
| RMSE( $\mu\text{g}/\text{m}^3$ ) | 16.15 | 16.6 | 17.57 | 17.87 | 18.67 | 18.55 | 19.32 |

Table S17. Percentage of data in different regions exceeding  $250 \mu\text{g}/\text{m}^3$

| Region   | North China | East China | South China | Sichuan Basin | Shaanxi Province |
|----------|-------------|------------|-------------|---------------|------------------|
| Rate (%) | 0.76        | 0.18       | 0.02        | 0.12          | 0.65             |

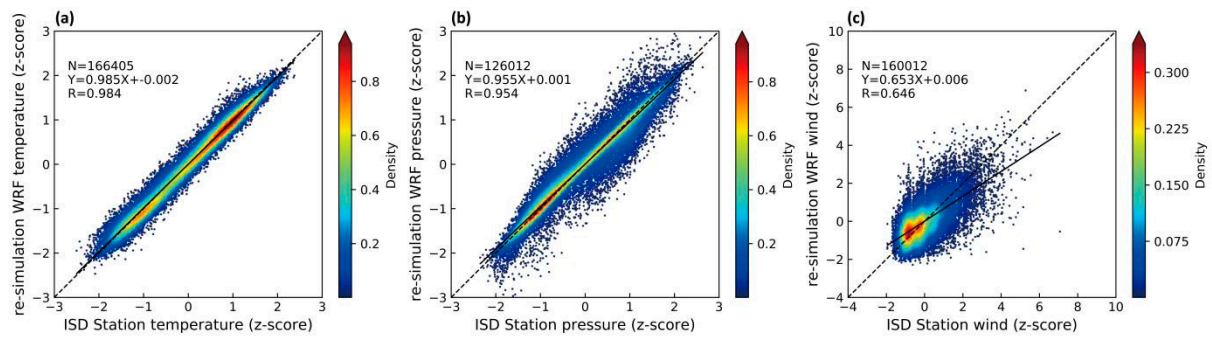

**Figure S1.** Validation of meteorological parameters simulated by WRF with observation data at ISD (Integrated Surface Database) stations. (a) temperature. (b) pressure. (c) wind speeds.

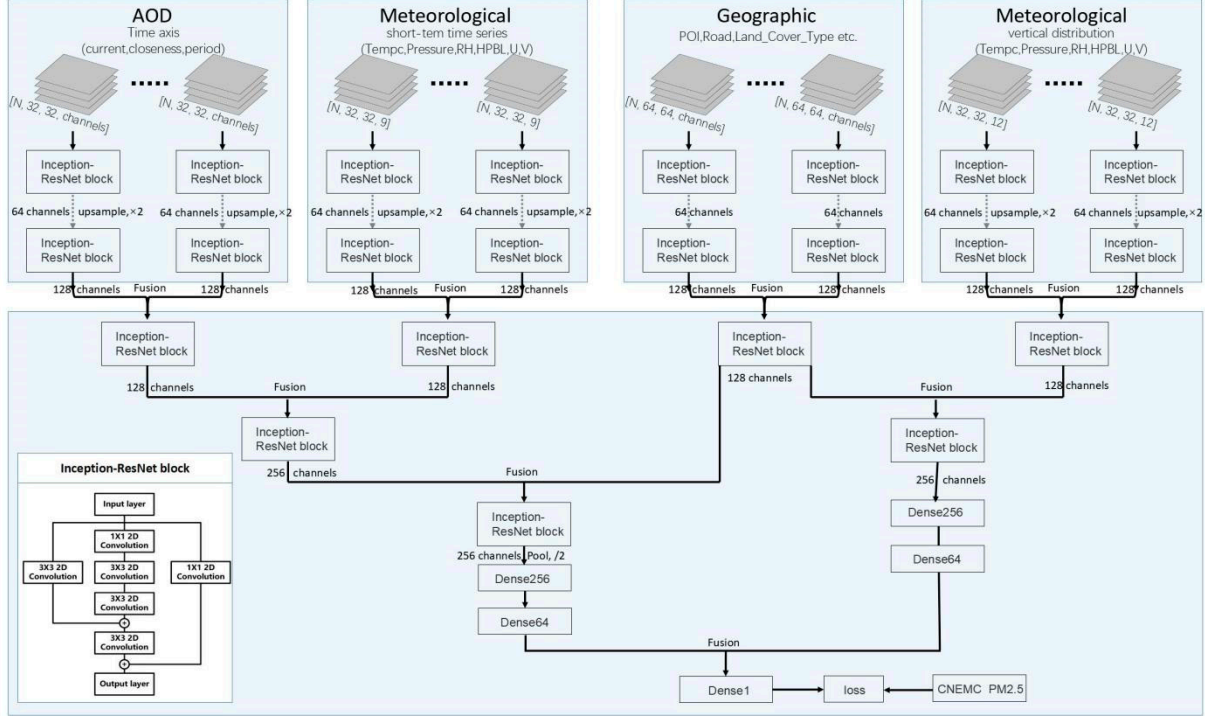

**Figure S2.** The architecture of the ST-NN model. Inputs data include AOD, meteorological data and geographic data. All the input variables have the 4-D dimensions as  $[N, \text{lat\_size}, \text{lon\_size}, \text{channel}]$ .  $N$  means the batch size,  $\text{lat\_size}$  and  $\text{lon\_size}$  means the scale of the data at latitude and longitude, channels represent the types or the height/time dimension of the data. Considering the computational efficiency and the generalization ability of the model, we choose  $N$  as 4. First, feature extraction was used for individual data by Inception-ResNet, which is an efficient feature extraction process. After it, we up-sampled the data at  $0.05^\circ \times 0.05^\circ$  resolution using the transposed convolution layer, which is a learning-based up-sampling method. We used the strides as 2 and a  $2 \times 2$  convolution kernel to double size of the input data. Accordingly, all data had the same size. Then we mined the characteristics of each variable and fused the data with same types by concatenate layer. Then the temporal and spatial features were extracted by fusing the time-series of aerosol and meteorological data with the geographic information data. The final result was obtained through the fully

connected layer.

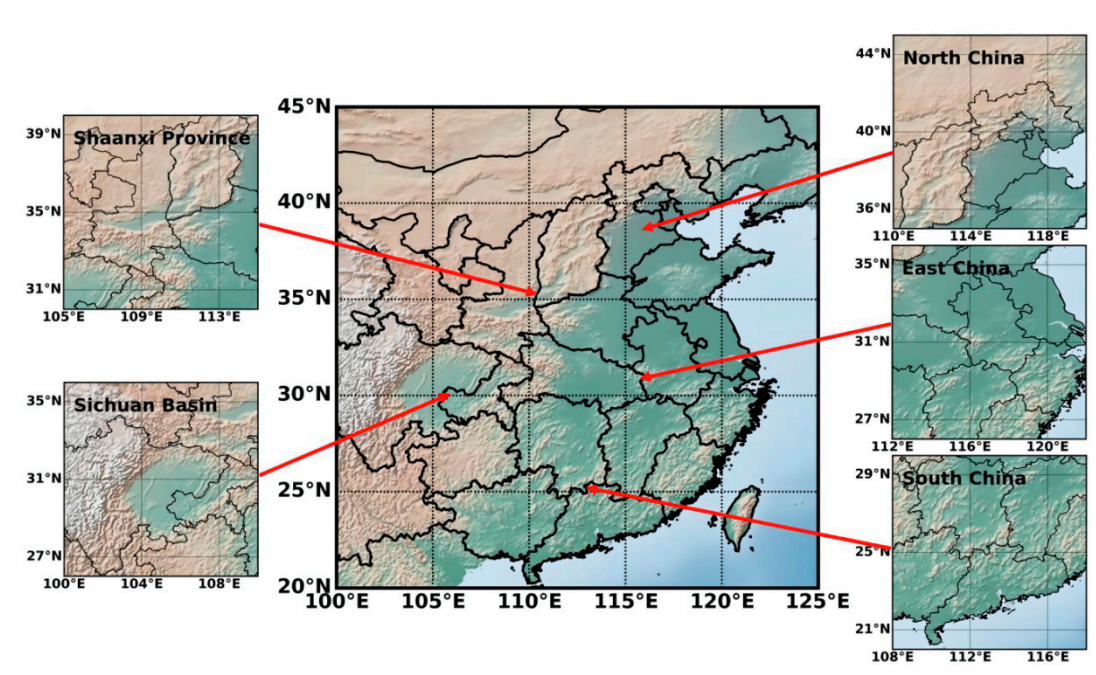

**Figure S3.** Locations and spatial range of major study regions. Study regions include North China, East China, South China, Sichuan Basin and Shaanxi Province.

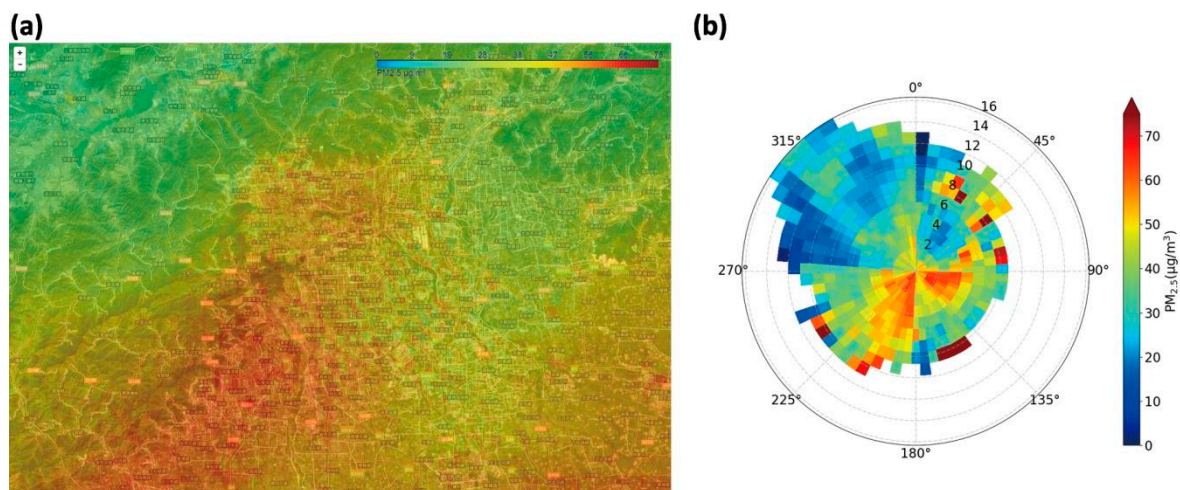

**Figure S4.** The annual average distribution of  $PM_{2.5}$  in Beijing (a). b is a rose, with radius representing wind speed and the color indicating mean  $PM_{2.5}$  concentrations.  $0^\circ$  is due north and  $90^\circ$  is due east. It can be seen that the main pollution comes from the southwest, significantly influenced by topography and transmission.



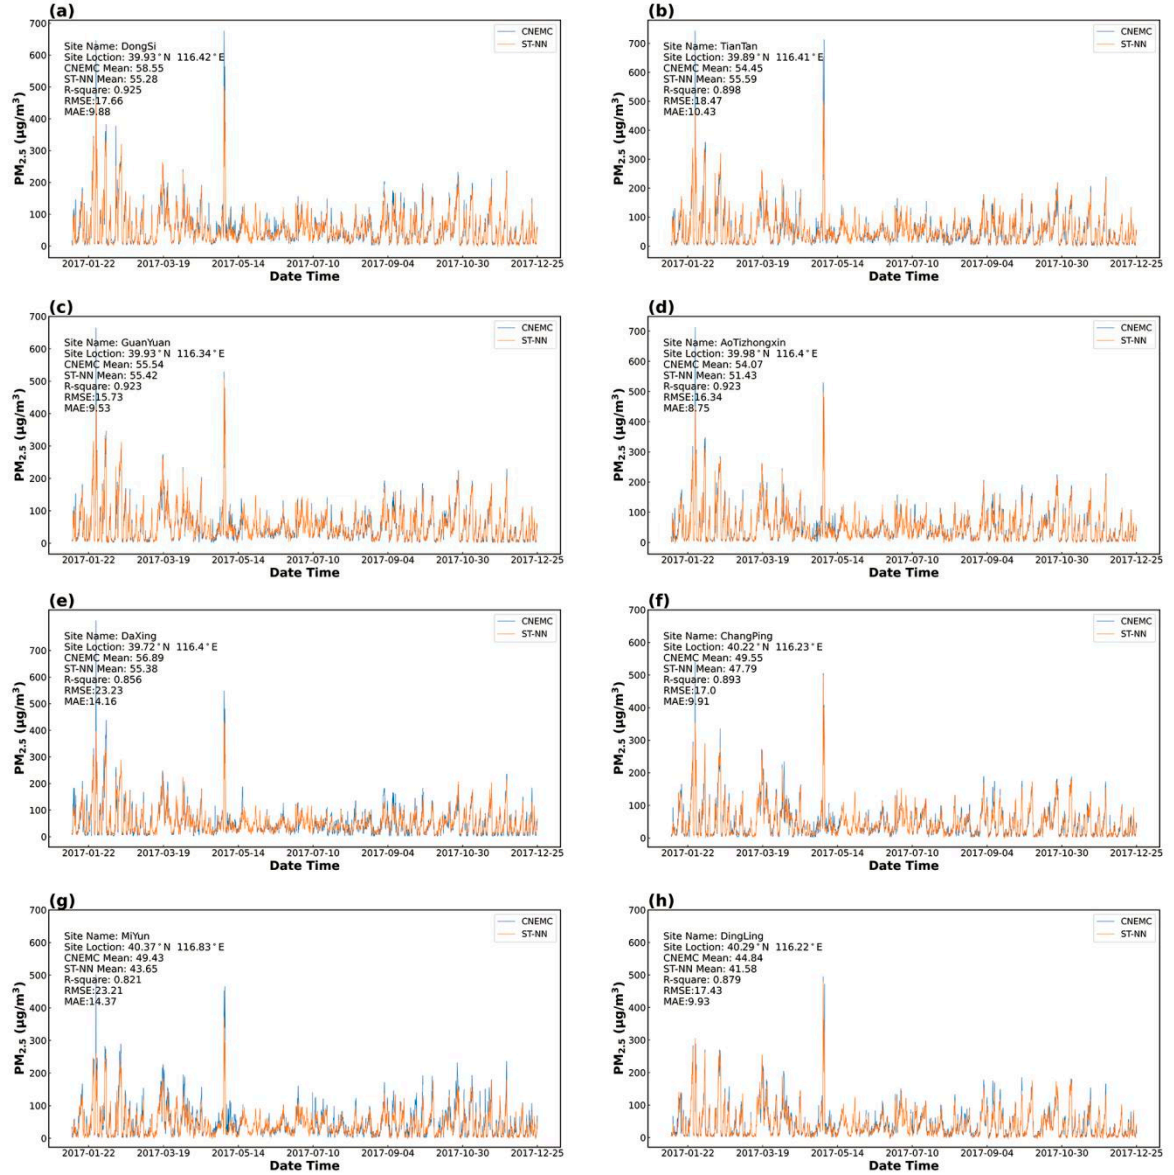

**Figure S5.** ST-NN model predicted and ground-level observed (not used in training) time series of PM<sub>2.5</sub> in Beijing stations. (a) Dongsi station in Beijing. (a) Tiantan station in Beijing. (c) Guanyuan station in Beijing. (d) Aotizhognxin station in Beijing. (e) Daxing station in Beijing. (f) Changping station in Beijing. (g) Miyun station in Beijing. (h) Dingling station in Beijing. (a-d) stations are in city, and (e-h) are rural stations.



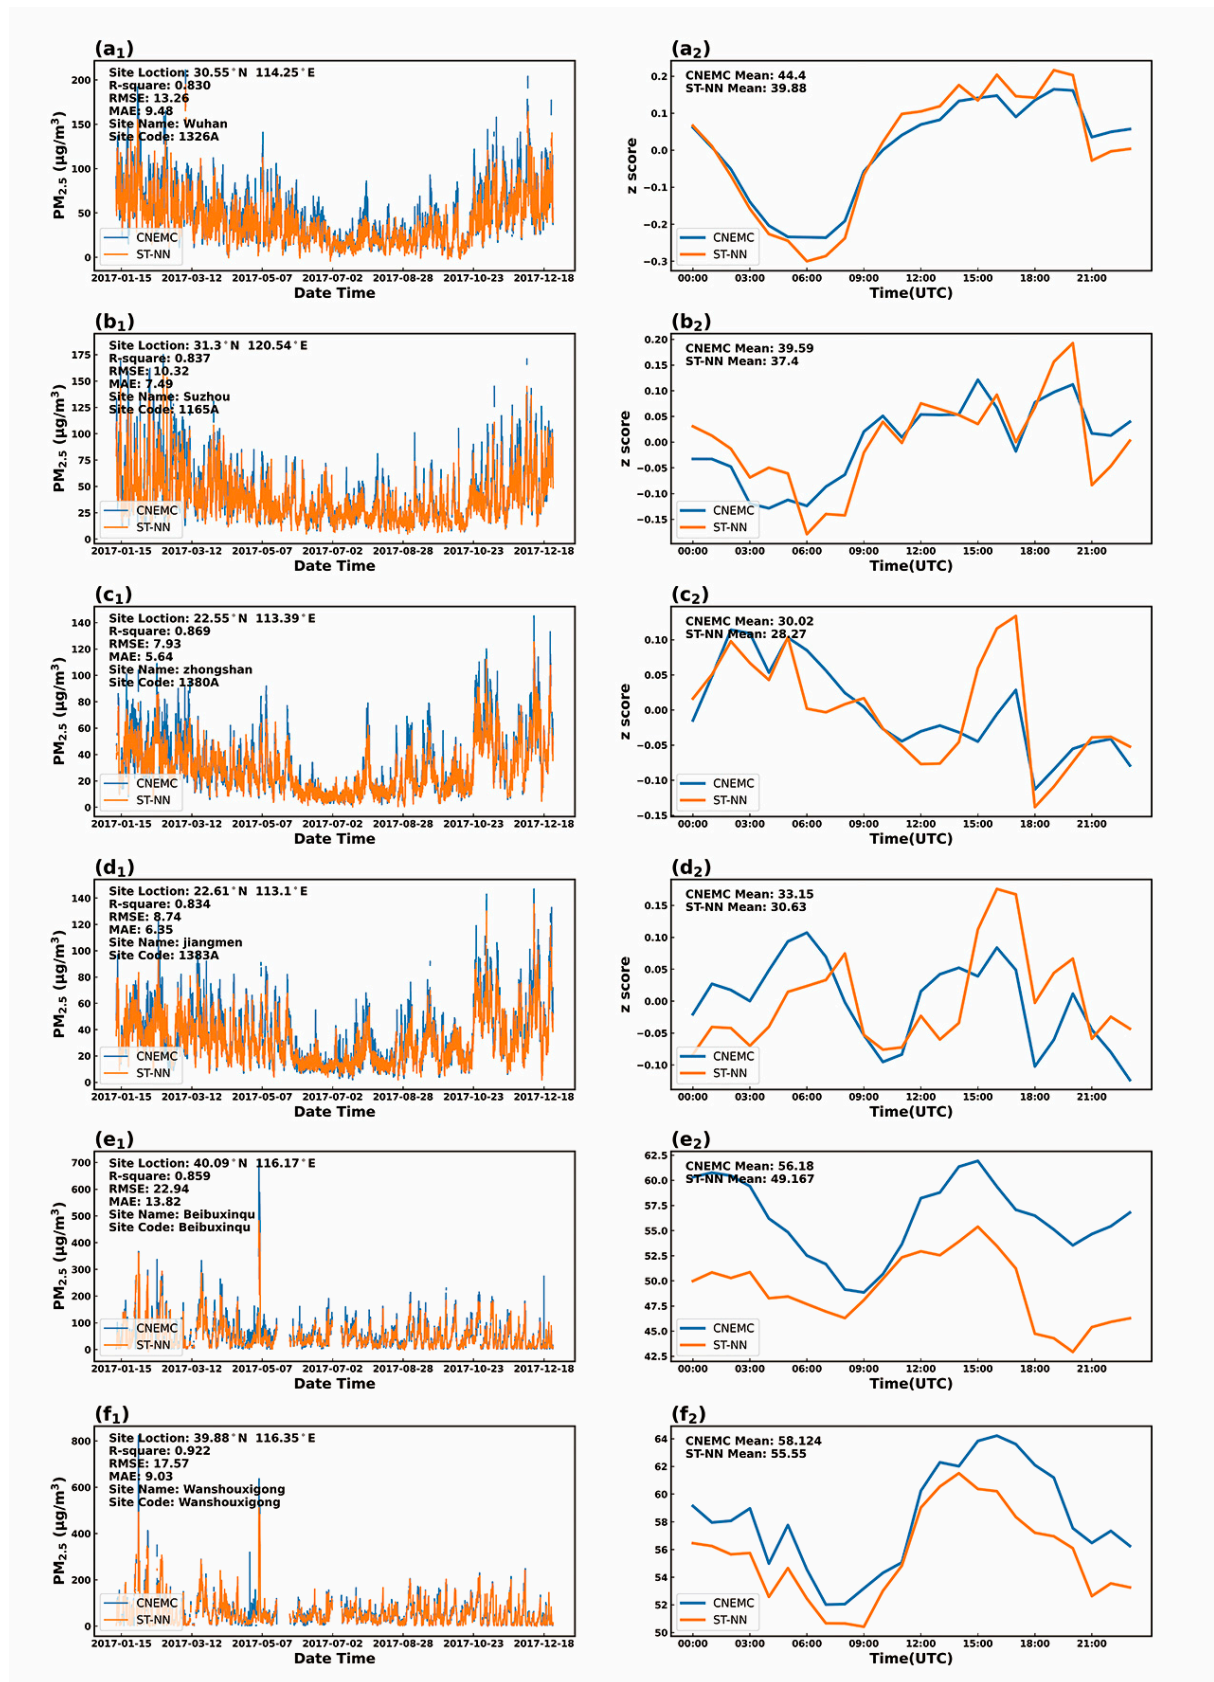

**Figure S6.** ST-NN model predicted and ground-level observed (not used in training) time series (2017) of PM<sub>2.5</sub> in China, and comparisons of their diurnal features. Left column: ST-NN model predicted and observed time series of PM<sub>2.5</sub> in Wuhan (a<sub>1</sub>), Suzhou (b<sub>1</sub>),

Zhongshan (c<sub>1</sub>), Jiangmen (d<sub>1</sub>), Guanyuan in Beijing (e<sub>1</sub>), Miyun in Beijing (f<sub>1</sub>); Right column: ST-NN model predicted and observed diurnal variation of PM<sub>2.5</sub> in Wuhan (a<sub>2</sub>), Suzhou (b<sub>2</sub>), Zhongshan (c<sub>2</sub>), Jiangmen (d<sub>2</sub>), Beibuxinqu in Beijing (e<sub>2</sub>), Wanshouxigong in Beijing (f<sub>2</sub>). Its vertical axis is the z-score coordinate.  $z - \text{score} = \frac{x - \mu}{\sigma}$ ,  $\mu$  is the sample mean and  $\sigma$  is the sample standard deviation.

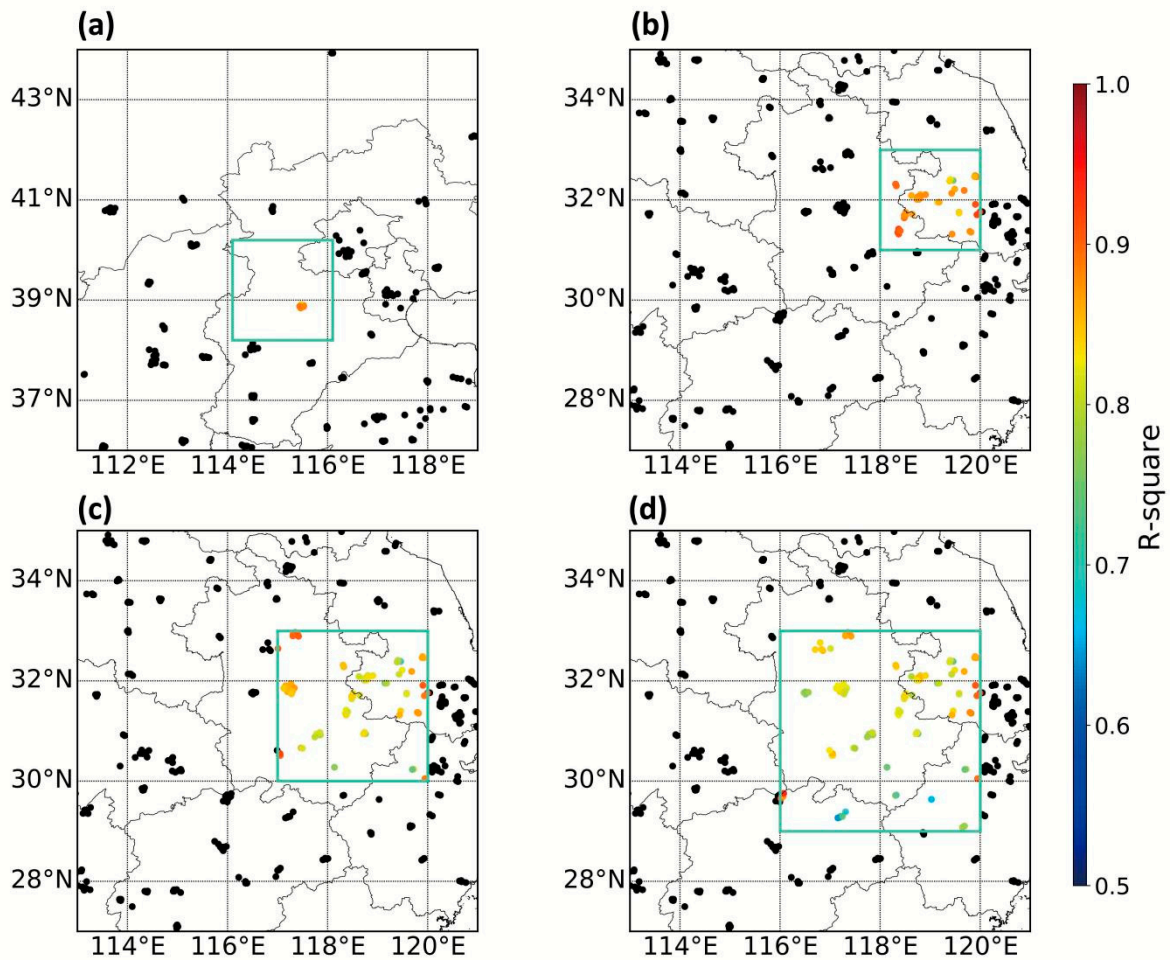

**Figure S7.** The block distribution of the regional mask validation. Validation was carried out for different spatial mask scales, the black points are the training sites, and the R-square distribution of the validation sites is enclosed by the solid blue line.

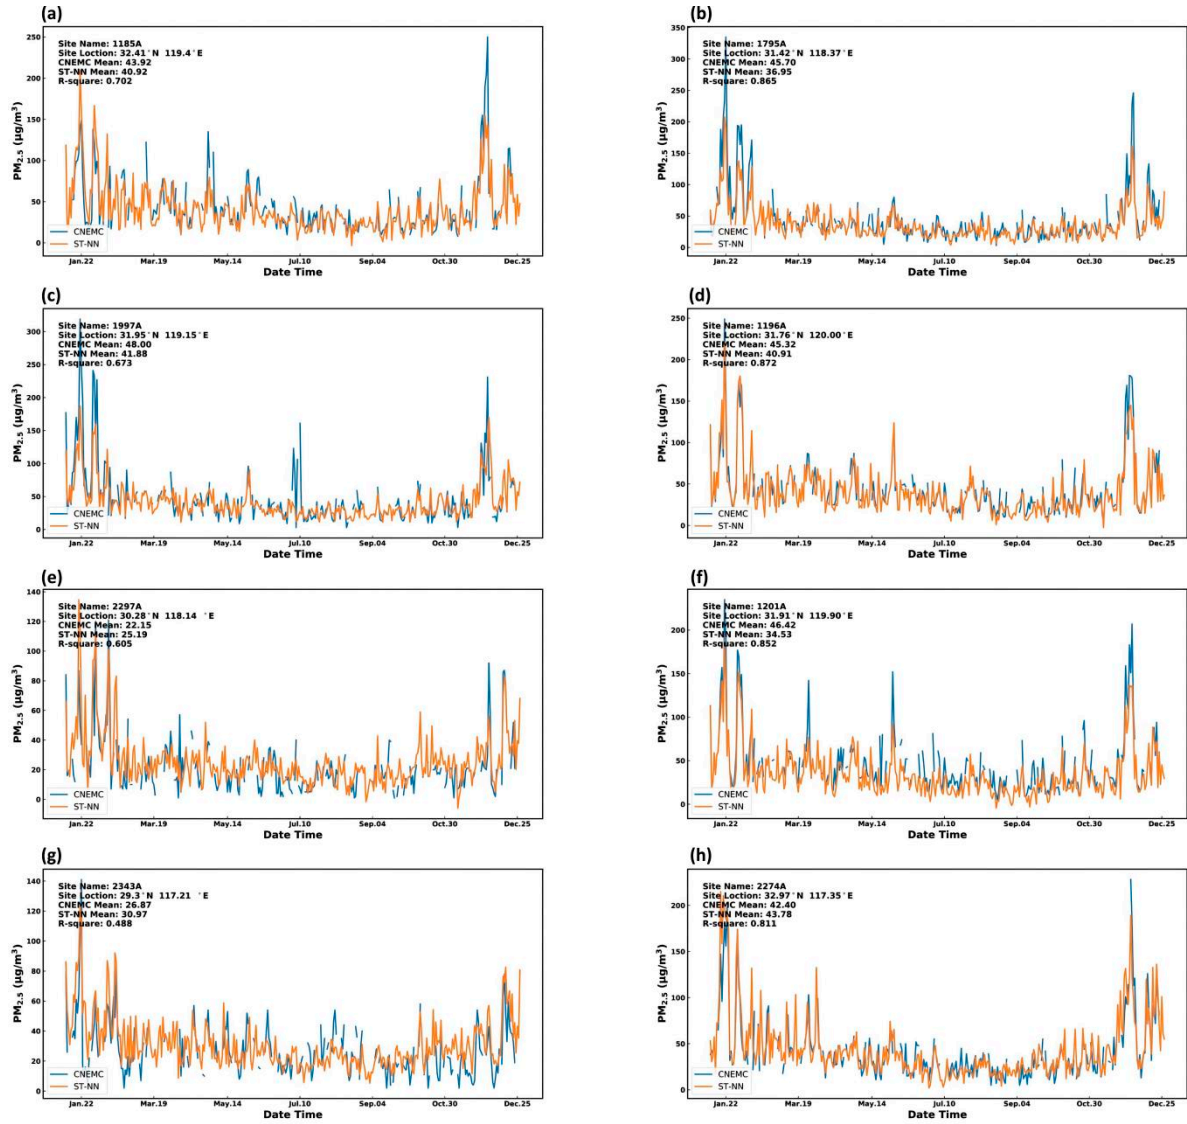

**Figure S8.** Time series of the regional mask performed (FigureS6b,c,d). (a,b) are the 1°x1° mask validation in the East China. (c,d) are the results of 2°x2° mask validation in the East China. (e,f) are the validation of 3°x3° mask in East China. (g,h) are the validation of 4°x4° mask in East China. And (a,b,c,g) are urban stations. (d,e,f,h) are rural stations.

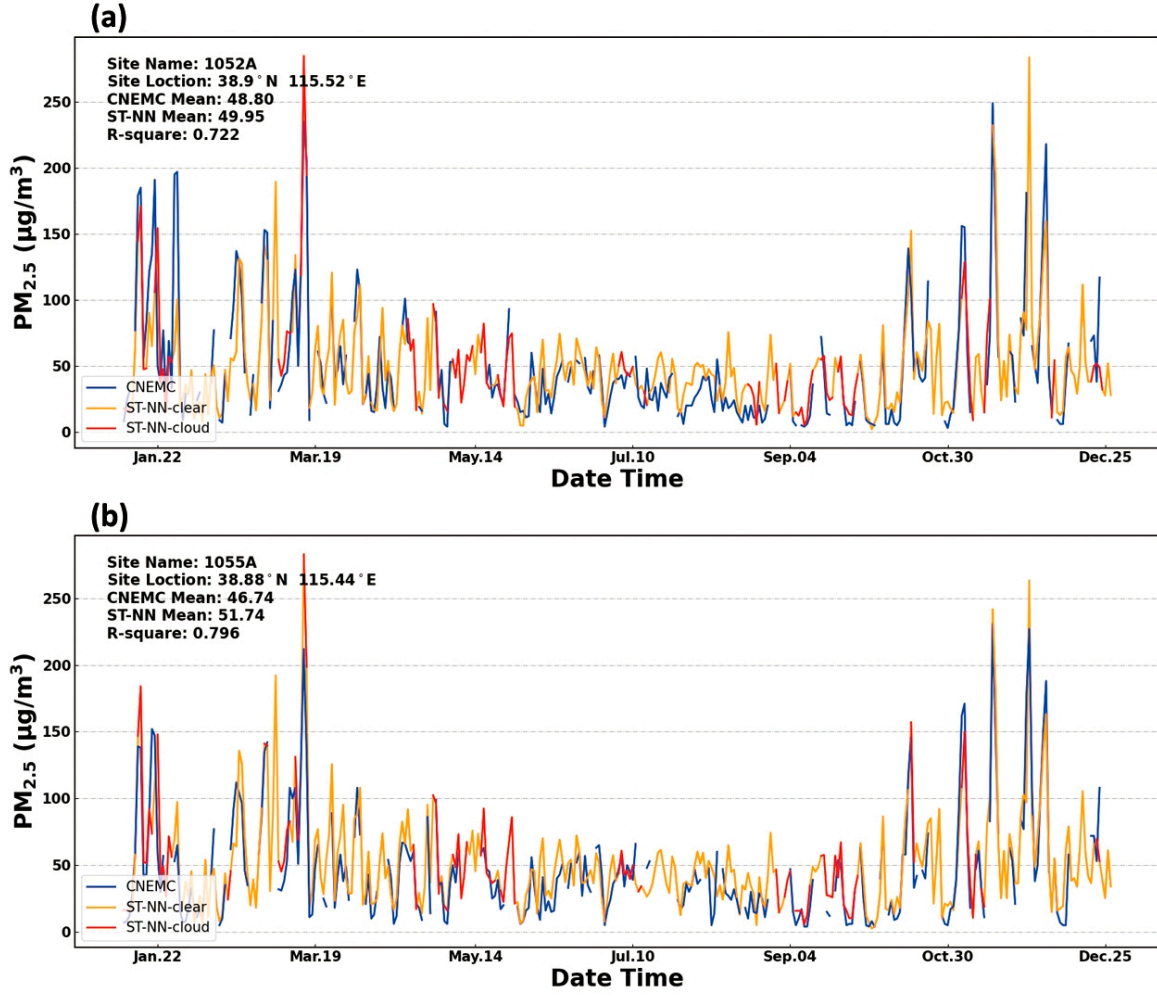

**Figure S9.** Time series of the regional mask performed (FigureS6a), they are the  $2^{\circ} \times 2^{\circ}$  mask validation in the North China. The blue line is the CNEMC data, the orange line is the ST-NN result for clear day, the red line is the ST-NN result for cloudy day. a is a rural station, b is an urban station.

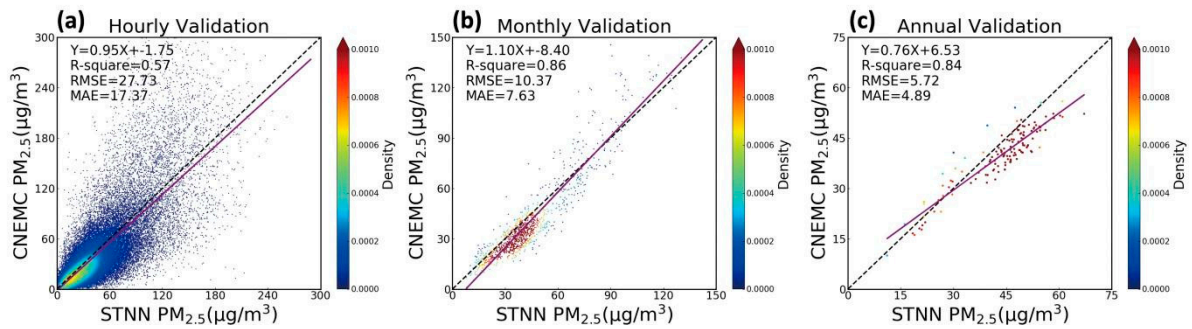

**Figure S10.** Density scatterplots of the ST-NN model (trained with data from 2017 to



2020 and test with 2020) with hourly(a),monthly(b),annual(c) validation. The fitting line is in purple, and the 1:1 standard line is the black dotted line.

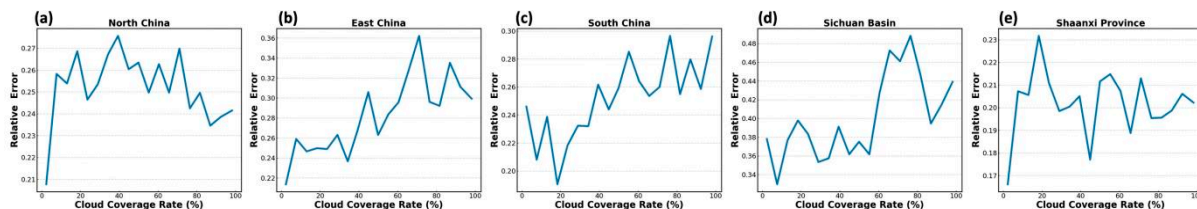

**Figure S11.** Relative error of cross validation under different cloud coverage rates.

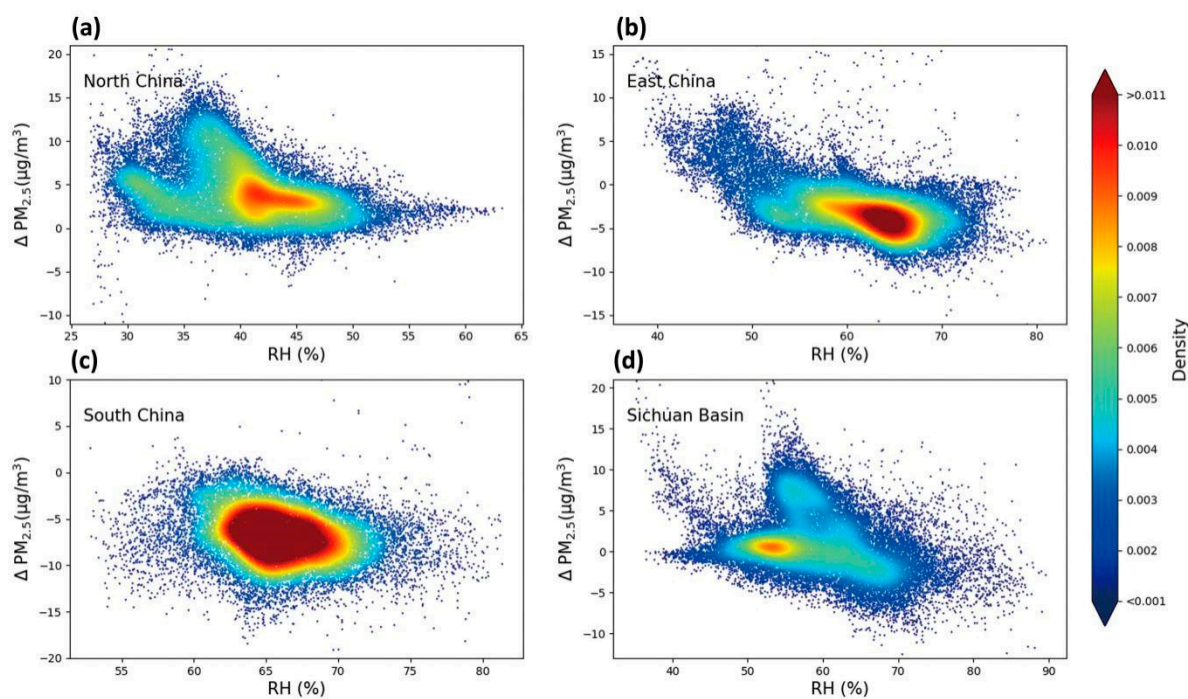

**Figure S12.** The density distribution diagram of changes in predicted  $PM_{2.5}$  concentrations as a function of relative humidity in marked cloudy conditions. (a) North China. (b) East China. (c) South China. (d) Sichuan Basin.

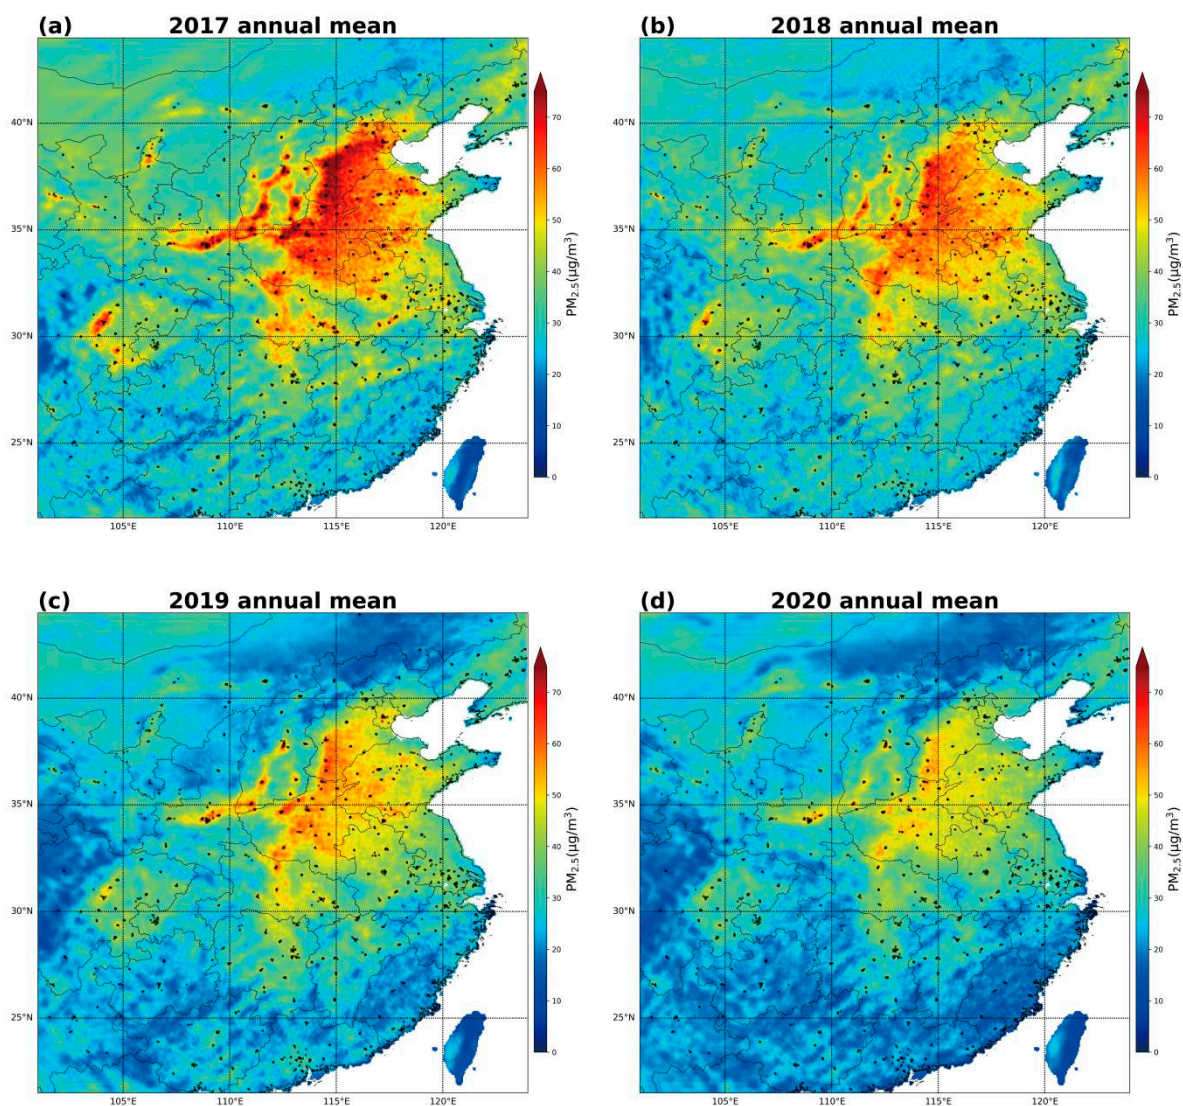

**Figure S13.** The distribution of predicted annual mean concentrations of PM<sub>2.5</sub> and the locations of monitoring sites.

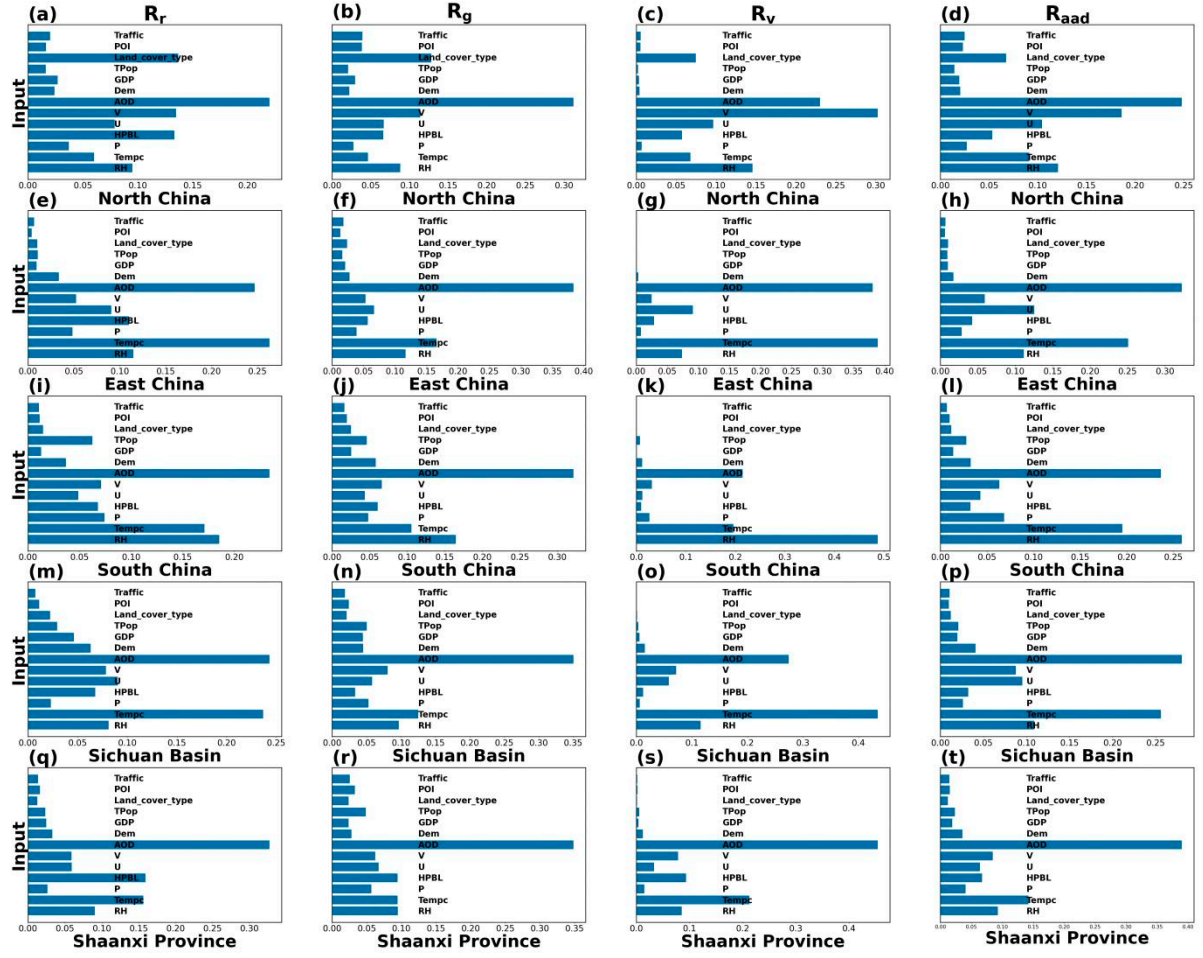

**Figure S14.** Relative importance indicators (R<sub>r</sub>: Relative range; R<sub>g</sub>: Relative gradient; R<sub>v</sub>: Relative variance; R<sub>AAD</sub>: Relative average absolute deviation) of input variables for different regions. (a-d) North China. (e-h) East China. (i-l) South China. (m-p) Sichuan Basin. (q-t) Shaanxi Province.



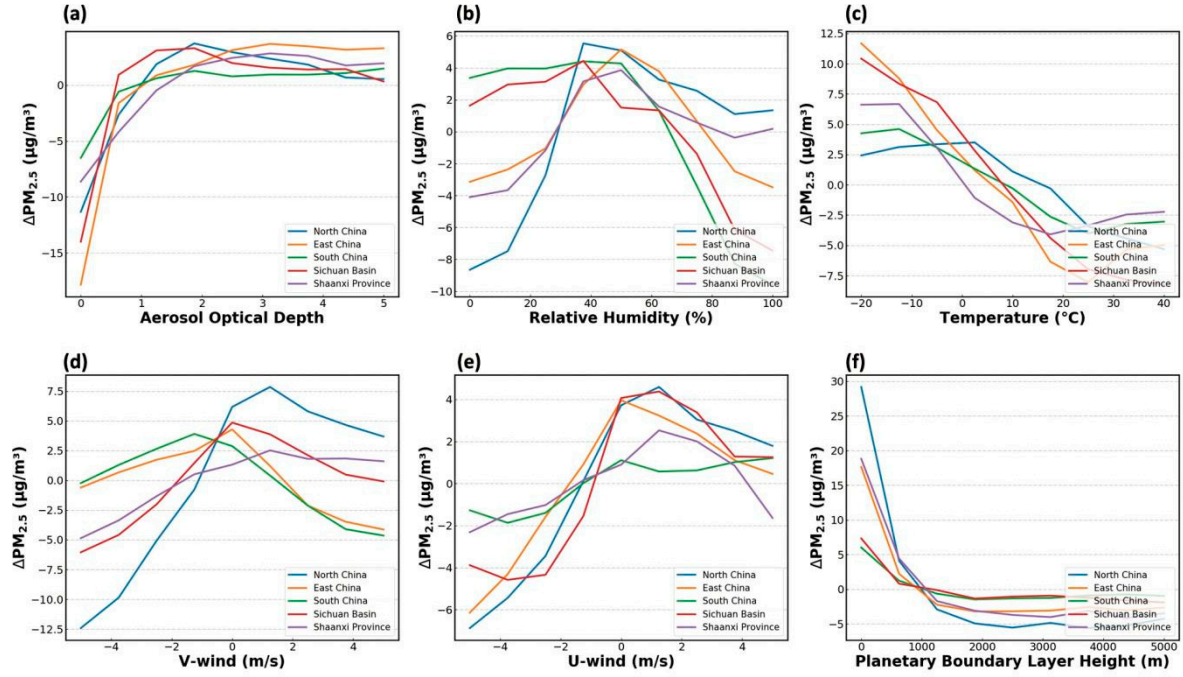

**Figure S15. Results of sensitivity analysis of key variables.** The influence of relative humidity is mainly due to the hygroscopic growth of  $PM_{2.5}$  and the wet removal which is more pronounced in North China. The effect of temperature is mainly seasonal. Low boundary layer pressure leads to higher surface  $PM_{2.5}$  concentrations.

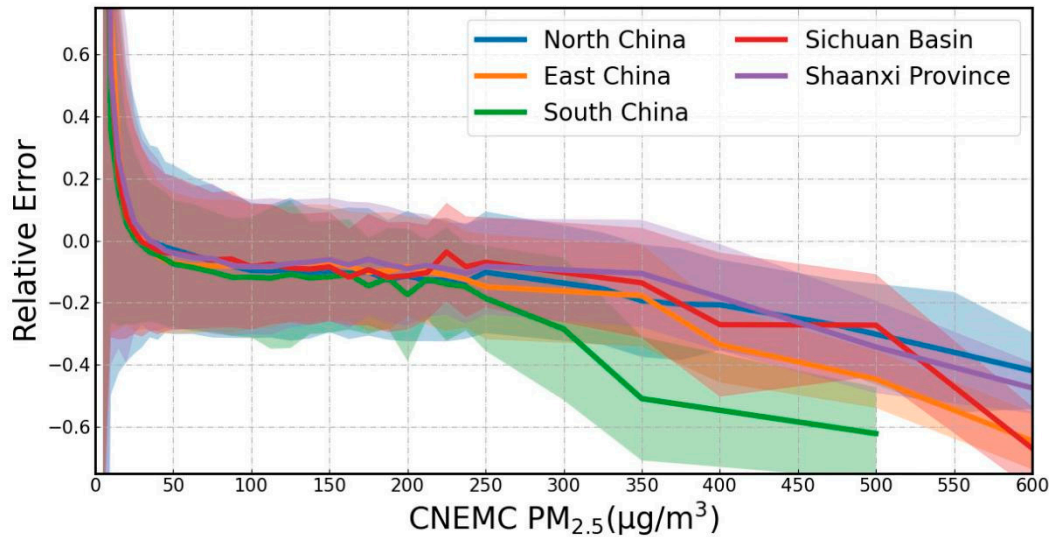

**Figure S16. Relative error varies with  $PM_{2.5}$  concentrations in different regions.** Five lines with different colors represent errors for North China, East China, South China, Sichuan



Basin, and Shaanxi Province.

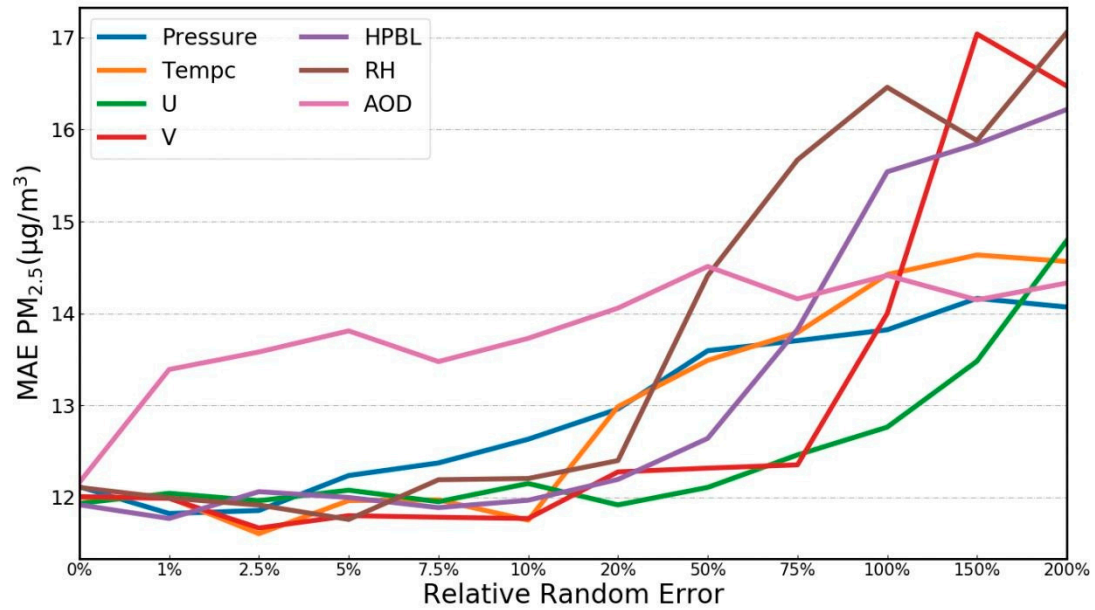

**Figure S17.** The relationship between the mean absolute error of the model and the relative error of different input data. Seven lines with different colors represent model inputs: pressure, temperature, zonal wind (U), meridional wind (V), boundary layer height, relative humidity, and AOD.

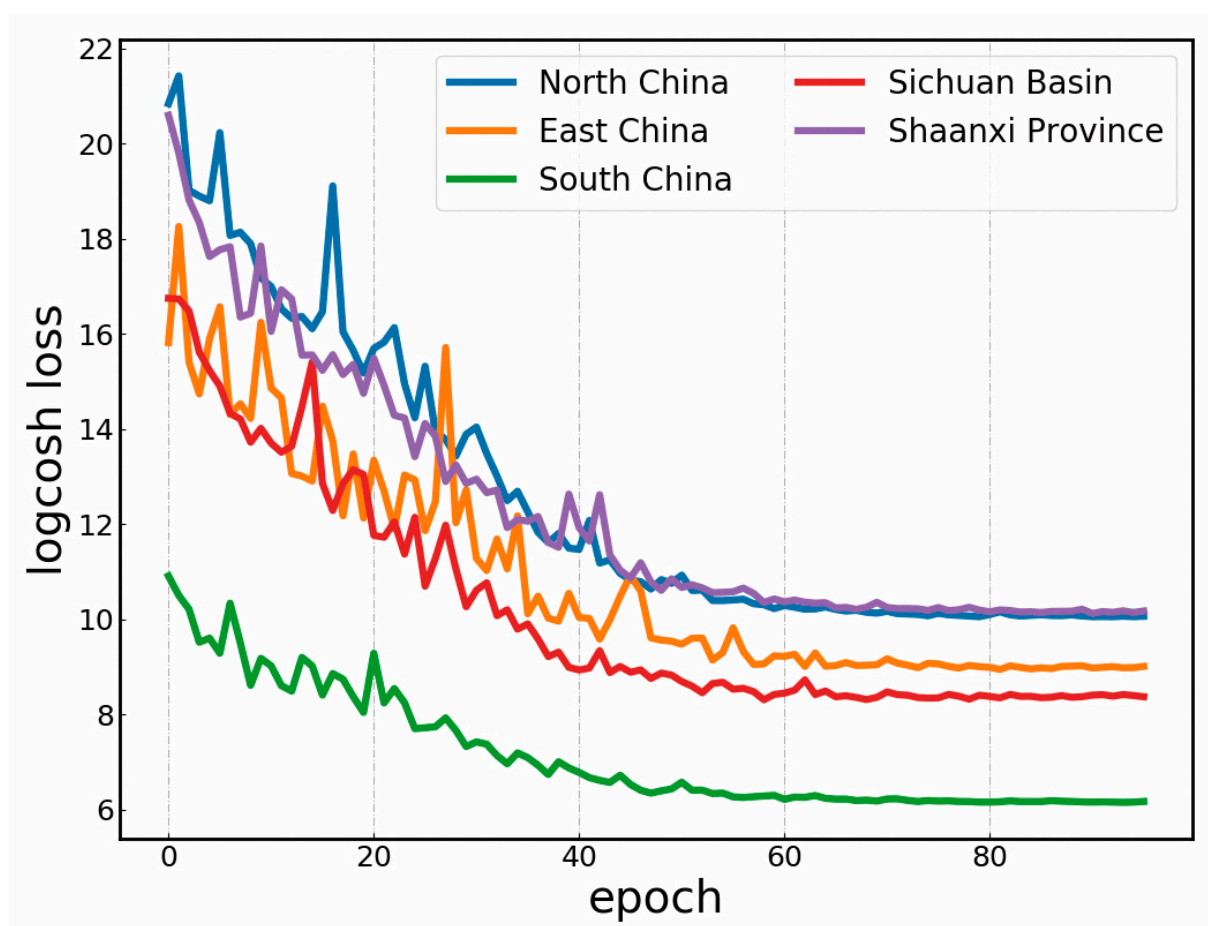

**Figure S18.** The performance of the validation data logcosh loss function for models built for different regions. Five lines with different colors represent results for North China, East China, South China, Sichuan Basin, and Shaanxi Province.

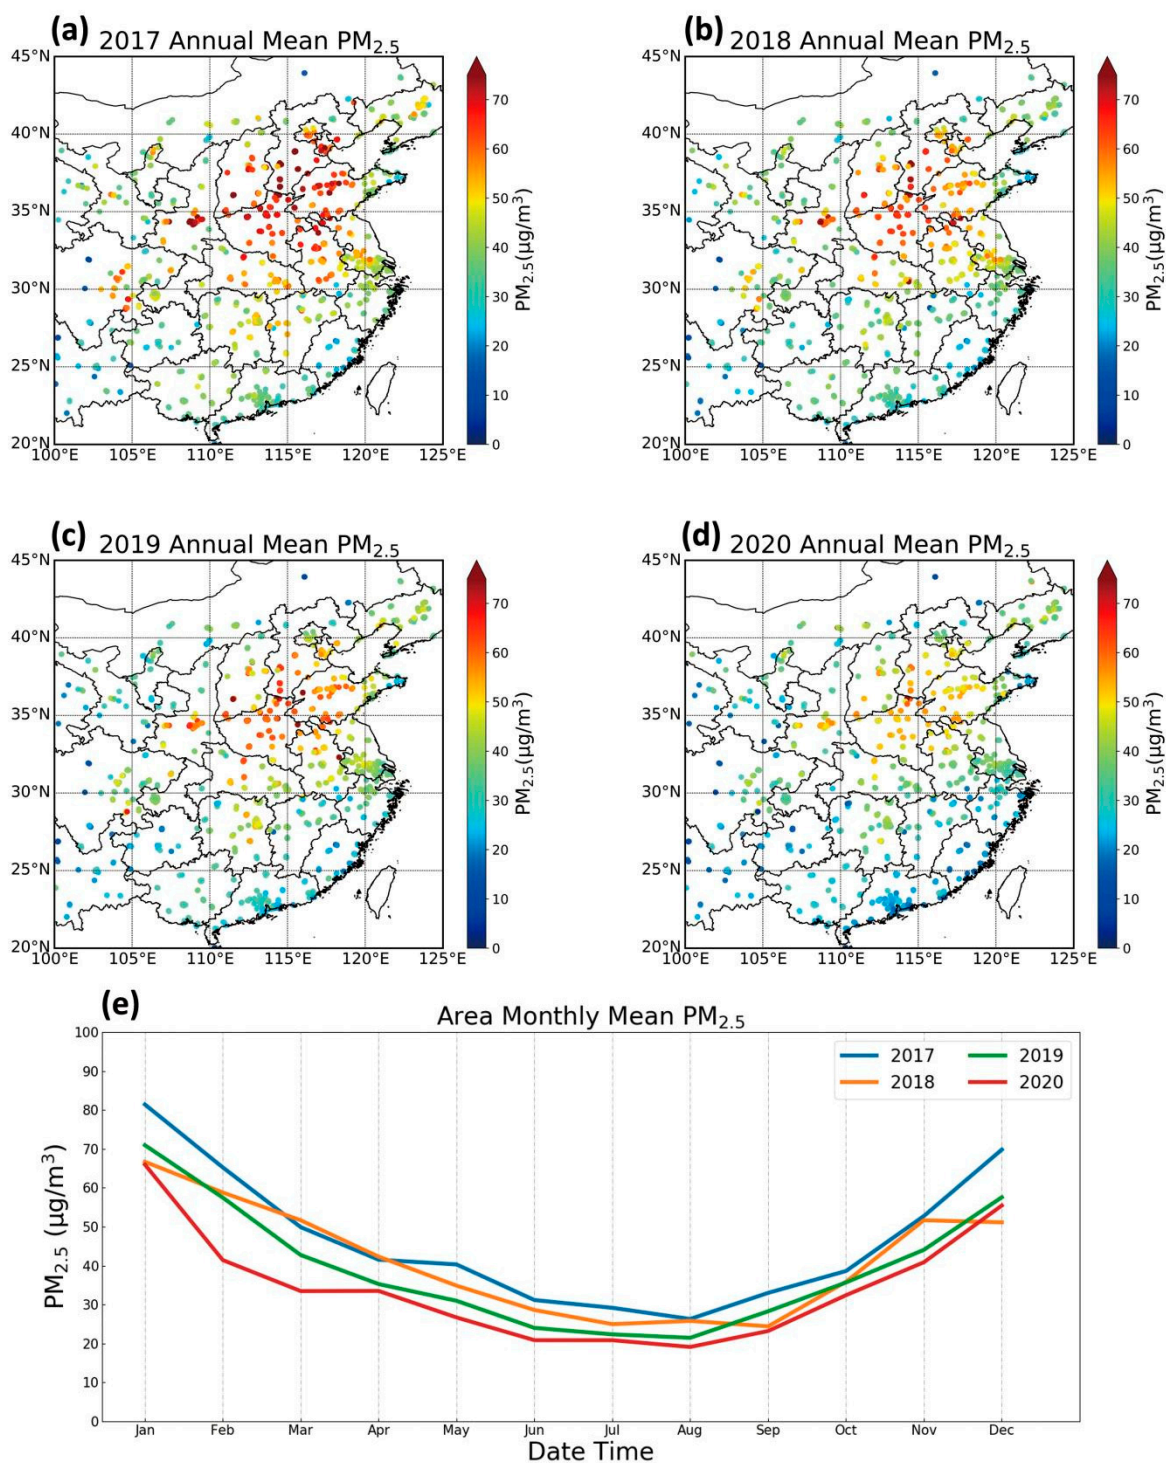

**Figure S19.** The spatiotemporal distribution of CNEMC observed  $PM_{2.5}$  concentrations. (a) Year 2017. (b) Year 2018. (c) Year 2019. (d) Year 2020. (e) Monthly variations.
